# Supplementary material for: Pre-Clinical Validation of A Novel Continuous Intra-Abdominal Pressure Measurement Equipment (SERENNO)
Source: MDPI journal article supplement (doi:10.3390/life12081161), 2022-07-30
Supplement: s1 [file s1]

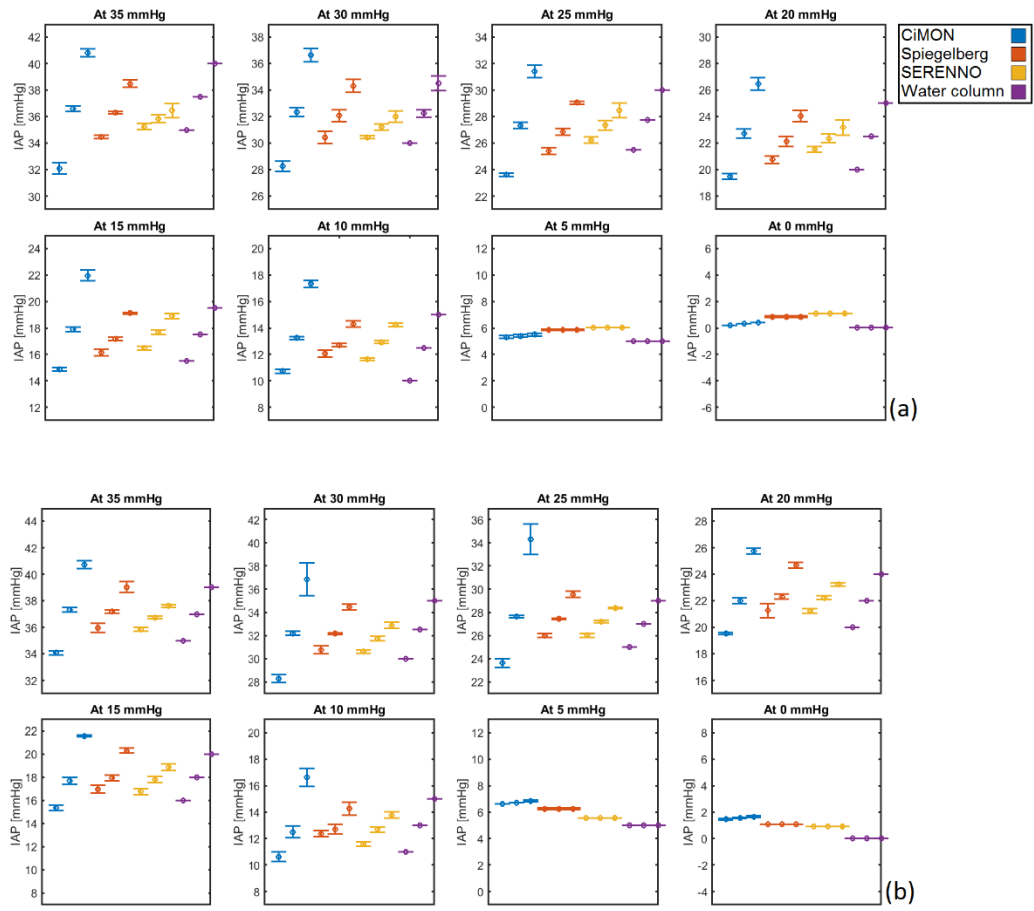

**Figure S1.** Mean and standard deviation of the IAP measurements via CiMON, Spiegelberg, and SERENNO systems. (a) Intra-observer variation of repeatedly ( $n = 6$ ) recorded intra-abdominal pressure (IAP) values (in mmHg) obtained with the different study devices. At each pre-set IAP level (water column height), the mean and standard deviation is shown for the minimum (end-expiratory), average, and maximum (end-inspiratory) measured IAP (b). Inter-observer variation.

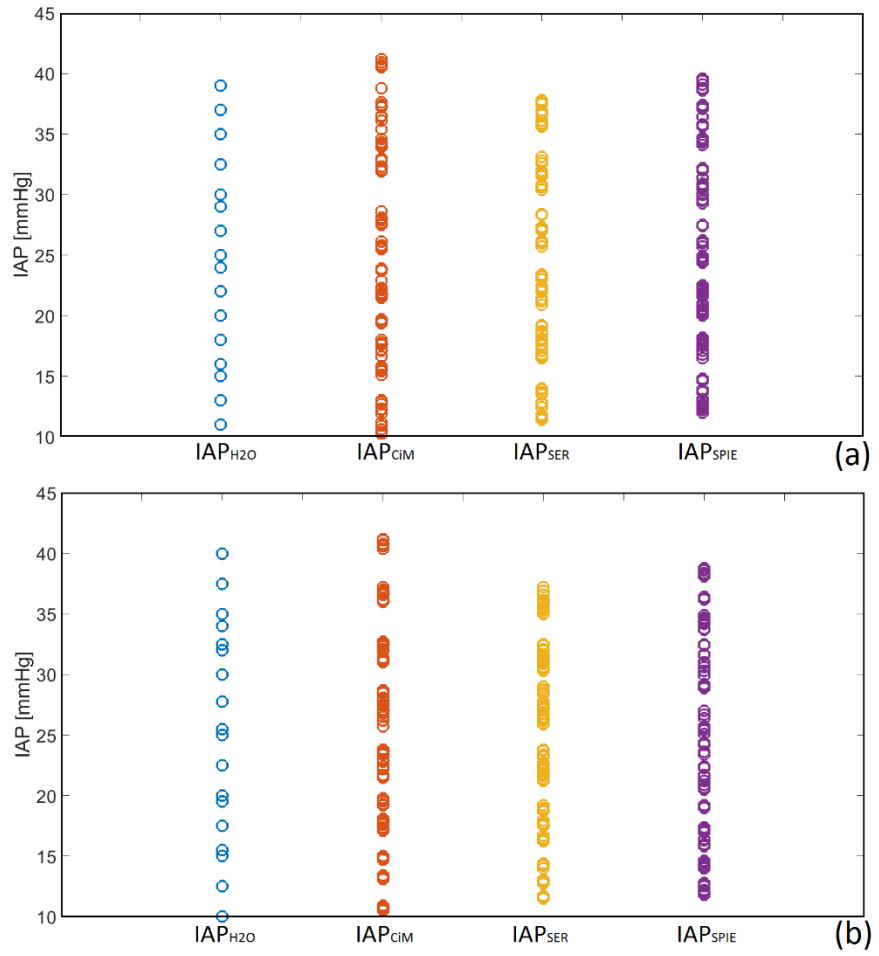

**Figure S2.** The intra-class correlation graph for (a) the inter-observer and (b) intra-observer measurements. A relatively high intra-class correlation coefficient (ICC) (0.984 and 0.982 for inter- and intra-observer measurements, respectively) was obtained between different measurement systems, which shows the high reliability of the measurements.

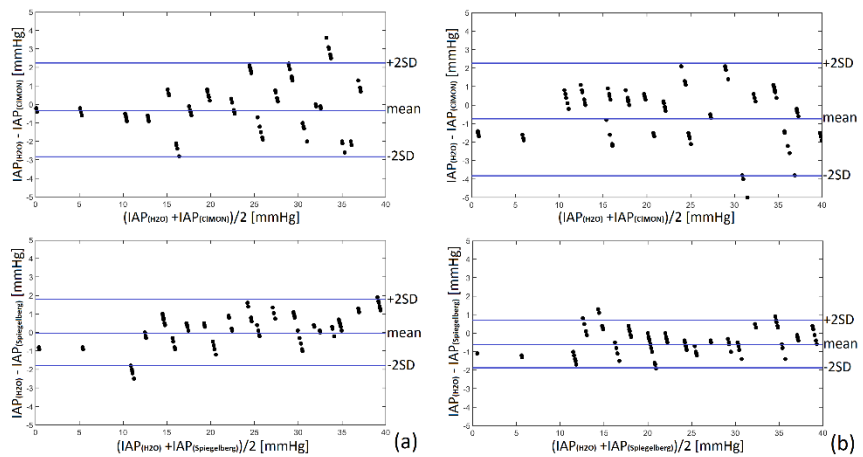

**Figure S3.** Bland and Altman's analysis results for (a) the intra-observer and (b) inter-observer measurements. In contrast to the SERENNO system, the Spiegelberg and CiMON devices showed a negative mean difference (overestimation). The bias, precision and limits of agreement were small and

confirm excellent interchangeability between the different techniques and the gold standard.

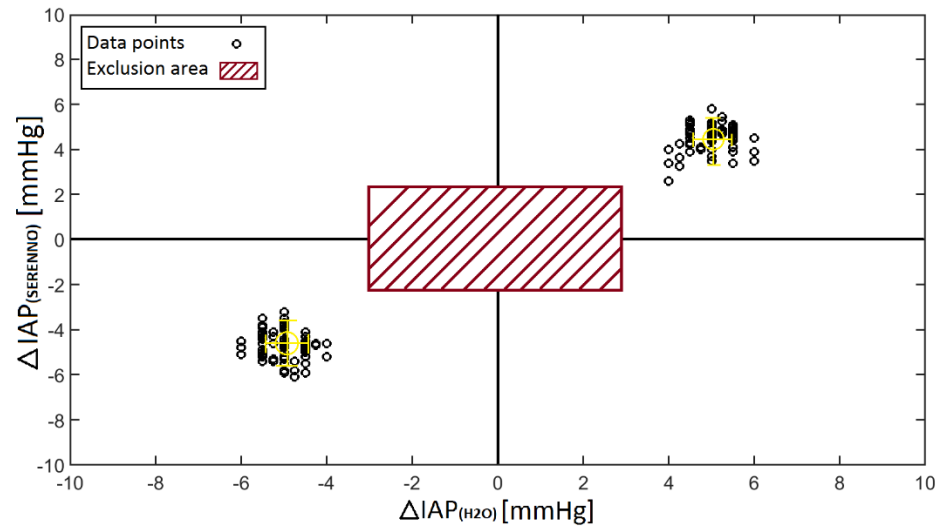

**Figure S4.** Concordance plot showing the ability of the SERENNO system to track the dynamic changes in the reference IAP. Consecutive  $\Delta IAP_{H_2O}$  and  $\Delta IAP_{SER}$  were calculated and plotted in relation to each other. The exclusion area is defined as the region where  $\Delta IAP_{H_2O}$  and  $\Delta IAP_{SER}$  are both smaller than 2.5 mmHg or one of them is 0.
